# Supplementary material for: Integration of light and metabolic signals for stem cell activation at the shoot apical meristem
Source: eLife journal article supplement (doi:10.7554/elife.17023), 2016-07-11
Supplement: supp [file elife_poa_e17023_Supplementary_File_2.xlsx]

## Sheet: Blatt1
pAP19	pB3::phyBY276H		Name		source of plasmid	PCR template	FW Oligo	RW Oligo	comment
pGGA014	At1g26680 (B3 TF) promoter (mutated Eco31I)		pGGA006	UBQ10 (At4g05320) promoter	Lampropoulos et al., 2013
pGGB003	B-Dummy		pGGA009	At3g59270 (FDB-like protein) promoter	this publication	Arabidopsis genomic DNA	aac aGG TCT CaA CCT gac ctt act ctt ttt gtt ttc cag ac	aac aGG TCT CaT GTT ctt ttt caa atg caa atc acc act
pAP18	phyBY276H		pGGA014	At1g26680 (B3 TF) promoter (mutated Eco31I)	this publication	Arabidopsis genomic DNA	aac aGG TCT CaA CCT cat tat tca tcg tga ttg tgt ata	aac aGG TCT Cag Cgt ctc ctg cct gcg act g	was amplified in 2 pieces
pGGD002	D-Dummy						aac aGG TCT Caa cGc act gtc acg tca gag ca	aac aGG TCT CaT GTT gag cac ctc ttg aga act tta aga aag	to remove internal Eco31I site
pGGE004	At1g26680 (B3 TF) terminator		pGGA022	ML1 promoter	Lampropoulos et al., 2013
pGGF014	pPPO::mPPO::tPPO		pGGA029	SUC2 promoter	this publication	Arabidopsis genomic DNA	aacaGGTCTCaACCTTAAAATCTGGTTTCATATTAATTTCgC	aacaGGTCTCATGTTATTTGACAAACCAAGAAAG
pGGZ003	destination vector		pGGA036	CAB3 promoter	this publication	Arabidopsis genomic DNA	aacaGGTCTCaACCTtttcaaatcaagagaaaatgtg	aacaGGTCTCATGTTtgaaactttttgtgtttttttttttttttg	Eco31I site was unchanged
			pGGA043	TCSnew	Lampropoulos et al., 2013	TCSn::GFP (Zürcher et al., 2013)	AACAGGTCTCAACCTCGGCTAAAAGCTTGACTAGTC	AACAGGTCTCATGTTTCTCCAAATGAAATGAACTTC
pAP20	pFDBL::phyBY276H		pGGB003	B-Dummy	Lampropoulos et al., 2013
pGGA009	At3g59270 (FDB-like protein) promoter		pGGC051	GUS	Lampropoulos et al., 2013
pGGB003	B-Dummy		pAP18	phyBY276H	this publication	Arabidopsis cDNA	aacaGGTCTCAGGCTcaacaATGGTTTCCGGAGTCGGGGG	aacaGGTCTCTAtgAACCATAACACGATC	was amplified in 5 pieces
pAP18	phyBY276H						aacaGGTCTCTTcaTAAGTTTCATGAAGATGAG	aacaGGTCTCAGtCCTGTCAACTCTGCAATC	to remove internal
pGGD002	D-Dummy						aacaGGTCTCAGGaCTCTCAGTTGAAGAAGC	aacaGGTCTCCGtGACCAACCCGTAAGCTTTTC	Eco31I sites and to
pGGE007	At3g59270 (FBD-like protein) terminator (mutated Eco31I)						aacaGGTCTCGTCaCGCAGTGAAGTGATTGG	aacaGGTCTCGTCaCCAAAAACCTCTATTG	introduce the Y276H
pGGF014	pPPO::mPPO::tPPO						aacaGGTCTCGGtGACCAGATAAGGATTCAAC	aacaGGTCTCACTGAATATGGCATCATCAGCATCATGTC	mutation
pGGZ003	destination vector		pGGD002	D-Dummy	Lampropoulos et al., 2013
			pGGE001	rbcS treminator	Lampropoulos et al., 2013
pAP22	pUBQ10::phyBY276H		pGGE004	At1g26680 (B3 TF) terminator	this publication	Arabidopsis genomic DNA	aac aGG TCT CaC TGC tat att att ttg cca caa aat cat ttt ttt gca g	aac aGG TCT CaT AGT gat ggt tag atg aaa caa at ccc ac
pGGA006	UBQ10 (At4g05320) promoter		pGGE007	At3g59270 (FBD-like protein) terminator (mutated Eco31I)	this publication	Arabidopsis genomic DNA	aac aGG TCT CaC TGC agc atg ttc cct ttt cat cgg	aac aGG TCT CaG ggc taa ata cag aga aga tga gct tga g	was amplified in 2 pieces
pGGB003	B-Dummy						aac aGG TCT Cag ccC gtc tca gat ggt ttc tag aga ag	aac aGG TCT CaT AGT aga gtt tga agc aat aac cag aga g	to remove internal Eco31I site
pAP18	phyBY276H		pGGE009	UBQ10 terminator	Lampropoulos et al., 2013
pGGD002	D-Dummy		pGGF004	p35S (mutated Eco31I)::D-AlaR::t35S	Lampropoulos et al., 2013
pGGE009	UBQ10 terminator		pGGF014	pPPO::mPPO::tPPO	this publication	pPPO30A-phyA Y242H-NLS	aacaGGTCTCAACTAcgatcgaattatataattatc	aacaGGTCTCGTCaCGTTCTGCCTTGGGAG	was amplified in 3 pieces
pGGF014	pPPO::mPPO::tPPO					(Rausenberger et al., 2011)	aacaGGTCTCCGtGACCCGCGCCTGCCAAAACC	aacaGGTCTCAGtCCACTTGCAACATGAGATG	to remove internal
pGGZ003	destination vector						aacaGGTCTCTGGaCTCTTGCGCCCTCTTTC	aacaGGTCTCAATACTACCCACTGGATTTTGG	Eco31I sites
			pGGZ003	destination vector	Lampropoulos et al., 2013
pAP21	pSUC2::phyBY276H
pGGA029	SUC2 promoter
pGGB003	B-Dummy
pAP18	phyBY276H
pGGD002	D-Dummy
pGGE001	rbcS treminator
pGGF014	pPPO::mPPO::tPPO
pGGZ003	destination vector
pAP62	TCSn::GUS
pGGA043	TCSnew
pGGB003	B-Dummy
pGGC051	GUS
pGGD002	D-Dummy
pGGE001	rbcS treminator
pGGF004	p35S (mutated Eco31I)::D-AlaR::t35S
pGGZ003	destination vector
pAP87	pCAB3::phyBY276H
pGGA036	CAB3 promoter
pGGB003	B-Dummy
pAP18	phyB-Y276H
pGGD002	D-Dummy
pGGE001	rbcS treminator
pGGF004	p35S (mutated Eco31I)::D-AlaR::t35S
pGGZ003	destination vector
pAP88	pML1::phyBY276H
pGGA022	ML1 promoter
pGGB003	B-Dummy
pGGC/ pAP18	phyB-Y276H
pGGD002	D-Dummy
pGGE001	rbcS treminator
pGGF004	p35S (mutated Eco31I)::D-AlaR::t35S
pGGZ003	destination vector
