# Supplementary material for: Integration of light and metabolic signals for stem cell activation at the shoot apical meristem
Source: eLife. 2016 Jul 11;5:e17023. doi: 10.7554/eLife.17023 (PMC4969040; doi:10.7554/eLife.17023)
Supplement: Supplementary file 1. — DOI: http://dx.doi.org/10.7554/eLife.17023.013 [file elife-17023-supp1.xlsx]

## Sheet: Tabelle2
Determination of sugars
Samples extracted with 800µl 80% EtOH, 700µl dried in speed-vac, dissolved in 400µl H2O
				ng/µl										ng/mg										MEAN ng/mg
		mg FW		Fucose	Arabinose	Galactose	Glucose	Mannose	Fructose	Sucrose	Raffinose	Maltose		Fucose	Arabinose	Galactose	Glucose	Mannose	Fructose	Sucrose	Raffinose	Maltose		Fucose	Arabinose	Galactose	Glucose	Mannose	Fructose	Sucrose	Raffinose	Maltose
AP1	cop1	56		0.072	0.0551	0.0898	30.1637	3.2622	0.3141	5.4825	0.4372	0.0721		1.2578	0.962563	1.56875	526.941	56.9886	5.48713	95.7759	7.63762	1.25954		1.17885	0.941916	1.702	510.03	54.0457	6.17846	100.854	8.12412	1.23495	MEAN
AP2	cop1	49		0.0599	0.053	0.1091	28.5533	2.8728	0.4385	5.0085	0.4097	0.0754		1.18612	1.04949	2.16037	565.405	56.8865	8.68307	99.1771	8.11278	1.49305		0.0478198	0.0688477	0.235782	37.8108	2.89201	1.29351	3.51766	0.28421	0.156594	SE
AP3	cop1	55		0.0615	0.0458	0.0775	24.639	2.7165	0.2457	6.057	0.4853	0.0536		1.09262	0.813694	1.37688	437.742	48.262	4.36516	107.61	8.62195	0.95227
AP7	WT dark	55		0.275	0.1327	0.1808	20.9053	0.998	1.0661	5.1758	0.4054	0.0209		4.88571	2.35758	3.21214	371.408	17.7307	18.9406	91.9545	7.20243	0.371314		5.27166	6.22648	9.42774	514.612	24.4653	69.0468	145.164	9.26952	0.595163	MEAN
AP8	WT dark	58		0.3957	0.5894	1.0049	41.5254	1.9012	6.8691	10.6567	0.609	0.0636		6.68986	9.96463	16.9892	702.045	32.1425	116.132	180.166	10.296	1.07525		0.733236	2.19694	4.03364	97.9751	4.18692	28.0973	27.0431	1.03355	0.240224	SE
AP9	WT dark	52		0.2264	0.3395	0.4316	25.1202	1.2562	3.8487	8.7247	0.5506	0.0181		4.2394	6.35723	8.08183	470.383	23.5227	72.068	163.372	10.3101	0.338927
AP13	WT dark 15mM Glc	53		0.3026	0.3756	0.5532	34.5361	2.1981	5.8915	11.0661	0.2693	0.0292		5.56588	6.90861	10.1753	635.241	40.4308	108.365	203.545	4.95338	0.537091		4.68143	5.808	9.43894	595.446	39.4031	103.252	179.359	4.98193	0.440839	MEAN
AP14	WT dark 15mM Glc	52		0.2187	0.26	0.4435	30.2455	2.0721	4.6381	9.2891	0.2915	0.0167		4.09522	4.86857	8.30466	566.355	38.8006	86.8497	173.941	5.45842	0.312712		0.449973	0.594397	0.575494	20.5932	0.516415	8.39252	12.6923	0.267237	0.0667045	SE
AP15	WT dark 15mM Glc	53		0.2383	0.307	0.5348	31.7906	2.1191	6.2272	8.7308	0.2465	0.0257		4.38318	5.64681	9.83686	584.741	38.9777	114.54	160.59	4.53401	0.472714
AP19	WT light	54		0.176	0.1703	0.2955	31.6097	1.7948	2.3239	4.6442	0.136	0.0877		3.18104	3.07801	5.34089	571.316	32.4393	42.0023	83.9396	2.45807	1.5851		3.77191	1.80996	4.50963	572.737	32.8975	30.8927	82.2599	2.64547	1.69448	MEAN
AP20	WT light	55		0.2651	0.0773	0.2505	32.8826	1.9886	1.3289	4.9522	0.1542	0.1233		4.70983	1.37333	4.45044	584.2	35.3299	23.6095	87.9819	2.73955	2.19058		0.474211	0.644189	0.463785	6.2485	1.29257	5.64375	3.88054	0.0937006	0.260645	SE
AP21	WT light	53		0.1862	0.0532	0.2032	30.592	1.6812	1.4715	4.0698	0.1489	0.0711		3.42488	0.978536	3.73757	562.695	30.9232	27.0661	74.858	2.7388	1.30778
Determination of adenosine compounds
		pmol/mg FW								MEAN pmol/mg FW
Sample		NAD	AMP	NADP	NADH	ADP	NADPH	ATP		NAD	AMP	NADP	NADH	ADP	NADPH	ATP
AP4	cop1	73.2957	21.654	14.2856	5.43777	30.1266	5.45553	55.2335		53.9057	17.5713	8.37919	4.27282	28.7904	4.81639	51.4282	mean
AP5	cop1	44.3024	13.8905	4.12628	3.68572	25.6567	3.6943	40.5203		9.69511	2.25013	3.04705	0.582479	1.57249	0.562855	5.53643	SE
AP6	cop1	44.1191	17.1694	6.72568	3.69498	30.5879	5.29935	58.531
AP10	WT dark	79.1433	9.17834	2.11634	1.27887	17.1611	6.4495	24.7351		67.6265	8.56144	2.3452	1.26351	15.97	5.24324	23.8251
AP11	WT dark	63.8508	7.91929	1.24927	0.97437	14.7848	5.56203	20.7074		5.8711	0.363676	0.708112	0.162685	0.685988	0.804412	1.60326
AP12	WT dark	59.8853	8.58668	3.67	1.5373	15.964	3.71819	26.0328
AP16	WT dark 15mM Glc	87.6853	11.0239	1.66652	1.70613	17.8946	6.36738	23.0482		79.745	9.82622	1.34096	1.37996	16.7262	5.83927	24.3389
AP17	WT dark 15mM Glc	60.8477	9.38686	0.4228	1.27828	15.7034	5.03334	23.9382		9.48868	0.605879	0.465509	0.166896	0.636702	0.409391	0.88385
AP18	WT dark 15mM Glc	90.7019	9.06789	1.93357	1.15546	16.5808	6.11709	26.0302
AP22	WT light	108.671	12.1862	n.d.	2.5119	28.7015	4.8052	33.4573		89.2347	9.73211	4.47499	1.85733	26.295	4.45447	32.2448
AP23	WT light	87.7079	8.49796	5.16521	1.61047	25.2737	4.02399	32.6089		10.8077	1.22703	0.563562	0.33056	1.20783	0.229015	0.825463
AP24	WT light	71.3253	8.51221	3.78477	1.44963	24.9098	4.53423	30.6682
Determination of BCKAs
		pmol/mg FW				MEAN pmol/mg FW
Sample		Glyoxylate	Pyruvate	Ketoglutarate		Glyoxylate	Pyruvate	Ketoglutarate
AP4	cop1	467.915	19.229	37.8177		446.849	22.5081	33.6869	mean
AP5	cop1	441.672	27.9958	30.2717		10.977	2.7612	2.20753	SE
AP6	cop1	430.962	20.2995	32.9714
AP10	WT dark	387.416	35.2496	41.4458		376.553	30.224	39.6759	mean
AP11	WT dark	341.076	27.2658	36.2798		18.1772	2.52593	1.69859	SE
AP12	WT dark	401.168	28.1566	41.3023
AP16	WT dark 15mM Glc	242.202	19.8442	18.8854		319.696	25.5533	25.2237	mean
AP17	WT dark 15mM Glc	479.289	34.0335	36.3348		79.8075	4.32409	5.57393	SE
AP18	WT dark 15mM Glc	237.597	22.7822	20.4507
AP22	WT light	329.776	22.963	20.5126		317.654	18.8099	16.6215	mean
AP23	WT light	302.328	21.2694	12.6671		8.08375	3.34225	2.26502	SE
AP24	WT light	320.859	12.1973	16.6849
Determination of anions and organic acids
Extracts of sugar samples used
				nmol/injection (25µl)								nmol/mg FW								MEAN nmol/mg FW
		mg FW		Nitrate	Malate	Citrate	Chloride	Nitrite	Sulfate	Phosphate		Nitrate	Malate	Citrate	Chloride	Nitrite	Sulfate	Phosphate		Nitrate	Malate	Citrate	Chloride	Nitrite	Sulfate	Phosphate
AP1	cop1	56		44.5556	0.3832	0.0498	6.5731	0.0186	4.8222	5.2319		58.3769	0.50207	0.0652482	8.6121	0.0243698	6.31807	6.85486		66.5487	0.426508	0.0695459	8.45146	0.0266023	6.35564	6.01691	MEAN
AP2	cop1	49		48.9788	0.238	0.0516	6.1313	0.0271	4.3854	3.841		72.7399	0.353461	0.0766328	9.10578	0.0402471	6.51289	5.70439		4.26287	0.0429182	0.00357012	0.431683	0.00731894	0.0821248	0.423454	SE
AP3	cop1	55		51.4304	0.3182	0.0501	5.7311	0.0114	4.68	4.1213		68.5293	0.423991	0.0667566	7.6365	0.0151901	6.23595	5.4915
AP7	WT dark	55		43.8437	2.3131	0.053	4.024	0.0288	4.8029	2.6843		58.4203	3.08213	0.0706208	5.36185	0.0383751	6.39971	3.57674		54.8501	3.41134	0.0649888	5.9898	0.0581552	6.97686	4.46875
AP8	WT dark	58		35.7862	3.0112	0.049	5.519	0.0535	6.2952	4.7222		45.3762	3.81814	0.062131	6.99798	0.0678369	7.98219	5.98766		4.78462	0.215981	0.00281607	0.509137	0.00989081	0.504499	0.763298
AP9	WT dark	52		43.2598	2.3738	0.0443	3.9943	0.0486	4.663	2.7356		60.7539	3.33375	0.0622147	5.60958	0.0682536	6.5487	3.84186
AP13	WT dark 15mM Glc	53		55.6413	0.8836	0.0238	4.2198	0.0684	4.542	3.2863		76.758	1.21894	0.0328325	5.82128	0.0943588	6.26576	4.5335		67.7653	0.925005	0.0266033	4.96188	0.0864376	5.24205	3.82958
AP14	WT dark 15mM Glc	52		47.4085	0.648	0.0196	3.4868	0.054	3.5076	2.6279		66.5803	0.910048	0.0275262	4.89685	0.0758374	4.92606	3.69061		4.88589	0.165555	0.00389031	0.478506	0.00551193	0.524197	0.372825
AP15	WT dark 15mM Glc	53		43.4629	0.4683	0.0141	3.021	0.0646	3.2869	2.3665		59.9577	0.646027	0.0194512	4.16751	0.0891167	4.53433	3.26462
AP19	WT light	54		42.9123	0.2976	0.042	4.9219	0.1667	3.4968	3.0053		58.17	0.403413	0.0569333	6.67191	0.225971	4.74011	4.07385		64.1095	0.370943	0.0458023	7.48918	0.20201	5.03235	4.50781
AP20	WT light	55		49.8378	0.324	0.0371	6.0803	0.1759	4.2732	3.8901		66.4073	0.431719	0.0494345	8.1018	0.234381	5.6939	5.18343		2.99496	0.047334	0.00769248	0.425269	0.0282709	0.331524	0.342341
AP21	WT light	53		49.1123	0.2013	0.0225	5.5772	0.1056	3.3802	3.0925		67.7511	0.277696	0.0310391	7.69383	0.145677	4.66304	4.26615
Determination of amino acids
		pmol/mg FW																								MEAN pmol/mg FW
Sample		Asp	Glu	Asn	Ser	Gln	Gly	His	Arg	Thr	Ala	Pro	Tyr	Val	Met	Orn	Ile	Leu	Lys	Phe	Agmatine	Putrescine	Spermidine	Citrulline		Asp	Glu	Asn	Ser	Gln	Gly	His	Arg	Thr	Ala	Pro	Tyr	Val	Met	Orn	Ile	Leu	Lys	Phe	Agmatine	Putrescine	Spermidine	Citrulline
555_AP_04	cop1	348.124	1156.22	4125.03	840.521	12227.7	62.421	453.382	2626.35	266.08	332.142	60.9487	14.7149	214.171	17.3812	118.861	167.559	153.315	433.872	98.8665	1290.08	83.9227	362.428	186.272		401.374	1227.13	4533.31	797.349	12627.8	121.117	491.696	2729.09	266.593	384.065	63.8291	18.4242	222.739	16.238	120.684	172.242	146.817	438.613	133.819	1332.89	72.6058	353.749	186.464	MEAN
555_AP_05	cop1	518.992	1319.64	5271.97	782.14	13570.1	196.211	546.964	2873.81	280.134	477.286	64.6756	24.2508	255.612	16.3494	135.1	186.94	144.832	487.977	192.366	1302.74	58.6756	330.864	184.433		58.8967	48.3988	370.018	21.898	472.924	39.4826	28.3135	74.4526	7.67462	46.7114	1.48041	2.94934	17.0529	0.694395	7.84988	7.5088	3.32993	27.2344	29.4567	36.6667	7.40441	11.5532	1.23109	SE
555_AP_06	cop1	337.005	1205.52	4202.91	769.385	12085.6	104.719	474.741	2687.13	253.564	342.766	65.863	16.3068	198.434	14.9835	108.092	162.226	142.305	393.992	110.224	1405.86	75.2191	367.955	188.685
555_AP_10	WT dark	450.242	649.025	3551.93	484.185	4307.9	948.743	355.489	583.506	316.018	978.241	107.73	95.3247	441.566	19.0518	40.8249	297.825	173.025	209.028	191.962	736.638	34.1458	154.74	14.9656		421.356	599.511	3479.65	426.421	3645.32	992.11	354.961	599.69	294.456	816.508	107.856	98.8748	430.461	16.2038	35.7265	289.684	157.876	205.624	198.223	653.444	25.9248	132.207	11.9436
555_AP_11	WT dark	345.719	512.062	2714.82	377.228	3010.37	760.203	319.863	498.339	278.334	677.498	109.591	98.2826	436.268	15.6206	32.443	302.823	158.679	198.567	192.524	495.643	20.7513	120.528	8.76515		38.168	43.8522	422.263	31.1719	374.818	148.007	20.1127	63.7033	11.2133	87.5574	0.968077	2.24029	8.59278	1.50448	2.58422	10.7374	8.98727	3.52895	5.98183	78.939	4.15609	11.2691	1.79162
555_AP_12	WT dark	468.105	637.446	4172.21	417.85	3617.68	1267.38	389.53	717.226	289.015	793.785	106.245	103.017	413.55	13.939	33.9116	268.404	141.923	209.276	210.182	728.049	22.8772	121.352	12.1
555_AP_16	WT dark 15mM Glc	331.296	621.11	2098.94	348.316	5536.88	1410.12	288.29	449.603	269.081	1168.13	94.0313	56.8918	291.25	12.2566	31.557	191.929	114.142	141.304	99.3575	508.582	24.7197	83.094	11.8128		373.59	619.331	3251.74	451.532	5812.5	971.291	315.413	628.919	289.052	1111.92	98.5764	60.3205	297.073	14.8653	34.966	180.435	114.002	175.417	133.977	620.685	28.0244	116.952	19.4871
555_AP_17	WT dark 15mM Glc	384.04	629.162	4980.63	611.208	6627.7	695.969	391.816	1094.15	359.204	1051.15	122.934	76.195	369.608	20.3606	37.0084	201.713	129.855	264.051	216.336	731.364	29.7909	128.497	30.4922		22.0307	6.25283	880.328	80.9712	414.662	221.775	38.7335	234.64	36.144	33.8481	12.952	8.35318	40.3021	2.7488	1.71562	16.6272	9.19349	44.707	41.3531	64.3156	1.6537	17.212	5.64361
555_AP_18	WT dark 15mM Glc	405.435	607.722	2675.67	395.07	5272.92	807.787	266.132	343.008	238.87	1116.48	78.7636	47.8747	230.362	11.9788	36.3327	147.664	98.0092	120.895	86.2383	622.11	29.5627	139.265	16.1563
555_AP_22	WT light	289.839	718.807	2395.35	1887.22	8095.02	1566.86	369.78	904.772	373.938	432.87	101.758	37.9907	262.885	11.4012	688.084	198.752	128.671	190.646	76.9043	694.323	14.415	210.851	143.769		259.675	588.52	2381.54	1743.13	7728.01	1406.39	315.239	805.711	311.469	333.185	85.6663	27.9027	228.036	8.1844	556.008	165.967	104.524	154.506	64.1469	759.11	15.8345	216.93	137.498
555_AP_23	WT light	240.258	507.164	2320.17	1770.79	8228.75	1363.49	294.59	743.995	288.117	292.323	79.5331	20.4485	196.857	6.57922	507.588	142.273	90.4255	132.801	55.6058	798.995	17.3047	232.618	154.167		15.2881	65.8124	32.1945	92.2125	435.584	83.0822	27.5373	50.0277	31.5646	50.1113	8.12139	5.23241	19.1488	1.60841	66.8165	16.926	12.1296	18.1918	6.49972	32.681	0.834566	7.90954	11.8561
555_AP_24	WT light	248.93	539.59	2429.1	1571.4	6860.27	1288.82	281.347	768.366	272.351	274.363	75.7076	25.2689	224.367	6.57276	472.353	156.877	94.4773	140.07	59.9306	784.012	15.7838	207.323	114.558
